# Supplementary material
Source: PubMed Central journal article supplement (PMC1748152)
Supplement: pnas_0603650103_1.pdf [file pnas_0603650103_1.pdf]

M. barkeri 1 (1) ---MAAKRYTSMAYANADEMTFVSKYVVKAGLDLETGAGYTIPEINYAPRPE--AGASK  
M. barkeri 2 (1) ---MAVTRCTKMYASADDMVFCKAVTAVKTTGLELETCAGYTTPEVNYAPRPE--AGASK  
M. barkeri 3 (1) ---MVKKYTSMAYANADELIFQSKFVVKAGLGLTEGAGYTTPEINYAPRPG--AGVSK  
M. acetivorans 1 (1) ---MVKKYTSMAYAKADDMLFVNSKYVVKAGLGLTEGAGYTTPELNYAPRPQ--AGSKS  
M. acetivorans 2 (1) ---MAAKRYTSMAYASADEMSFVSKYVVKAGLGLTEGAGYTIPEVNYAPRPE--AGASK  
M. acetivorans 3 (1) ---MAVTRCTKMYASADEMTFCKATKAVKAGLGLTEGAGYTTPEVNYAPRPE--AGASK  
M. mazei 1 (1) ---MAATRFTKMYASADEMTFVSKYVVKAGLGLTEGAGYTIPEVNYAPRPE--AGASK  
M. mazei 2 (1) ---MVKKYTSMAYANADELIFQCKFVVKAGLGLTEGAGYTTPEVNYAPRPQ--AGSKS  
M. mazei 3 (1) ---MAVNRCTKMSYASADEMIFCKAVKAVKAGLGLTEGAGYTTPEVNYAPRPE--AGASK  
M. burtonii 1 (1) ---MAINRYTKMAYSDADMIFCKCKHFVKAGLGLTEGAGYTIPEVNYAPRPE--AGASK  
M. burtonii 2 (1) ---MGLSLKRYNKMAYDDFEDMVFCHSIVIKTKGFDLTEGAGYTSAEVNYAPRPA--AGESK  
M. stadtmanae 1 (1) ---MSRKYFTKMNENASADEMVFQTKHFVKMGLDQVMGGGEVVPNIKVAPAE--SEESI  
M. stadtmanae 2 (1) ---MSRKYFTKMNENASADEMVFQTKHFVKMGLDQVMGGGEVVPNIKVAPAE--SEESI  
M. stadtmanae 3 (1) ---MVLKRFTKMNENASADEMVFQTKHFVKMGLDQVMGGGEVVPNIKVAPAE--SEESI  
M. stadtmanae 4 (1) ---MAAKRFTKMKNSADDLVFCKAANVVEYFGVVKLGGEVVPNIKVAPAE--SETSV  
M. thermoacetica (1) MDYKPVKFTSELEVKSLDDDFVCIAPHFVVKAKNGMVICAGYTIPEINMVLTPMNIESTM  
RC1 (1) ---MSLKLNSMAYQSPDLMMFCGALKPVRVRCGMAIGGCAVIPEIVPHPRLG--SEQNL

61

120

M. barkeri 1 (56) EKLIKEYERITTDVMERMVQVGFPAVILETEHVQQMSNNPSWGAEVAHAQKTIMEYHDE  
M. barkeri 2 (56) EKLIKEYERITTDIMARMVQIGAPAVVLETEHVQQMSNHPDWGAVAHAQKTIMEDYHDE  
M. barkeri 3 (55) EKLIKEYERITTDVMSRMVQIGAPSVILETEHVQQMSNNPEWGGVAHAQKTIMEEYHDE  
M. acetivorans 1 (55) DKLVKEYERITTDAMARMVQIGAPSVILETEHVEQMSNNPDWGGVAHAQKTIMEEYHDE  
M. acetivorans 2 (56) EKLIKEYERITTDIMGRMVQVGFPAVILETEHVQQMSNNPSWGAEVAHAQKTIMEEYHDE  
M. acetivorans 3 (56) EKLIKEYERITTDIMARMVQIGAPSVVLETEHVQQMSNHPDWGAVAHAQKTIMEDYHDE  
M. mazei 1 (56) EKLIKEYERITTDIMARMVQVGFPAVILETEHVQQMSNNPSWGAEVAHAQKTIMEEYHDE  
M. mazei 2 (55) EKLVKEYERITTDIMARMVQIGAPSVILETEHVEQMSNNPDWGGVAHAQKTIMEEYHDE  
M. mazei 3 (56) EKLIKEYERITTDIMARMVQIGAPAVVLETEHVQQMSNNPEWGAVAHAQKTIMEDYHDE  
M. burtonii 1 (56) EKLIKEYQKITTDIMNRMVQVGFPAVILETEHVQQMSNNPDWGAVAHAQKTIMEEFHDE  
M. burtonii 2 (58) EKLIKEYQKITTDVLRMVQVGFPSVILETEHVQQMTVNPNSWGAEIAHEQKTIMEEFYDE  
M. stadtmanae 1 (56) DGLEATSKNIAFAACDRAAAIIGLPAIQIEMEHVQQQSI SKEASARCTAVTFEELEKLDK  
M. stadtmanae 2 (56) DGLEATSKNIAFAACDRAAAIIGLPAIQIEMEHVQQQSI SKEASARCTAVTFEELEKLDK  
M. stadtmanae 3 (56) DGLEATSKNIAFAACDRAAAIIGLPAIQIEMEHVQQQSI SREASARCTAVTFEELEKLDK  
M. stadtmanae 4 (56) EGMVATCKNIAFSACDRAAAIIGLPTVQIEQEHVAQQTSREISAKTTAVQIEQLEELDK  
M. thermoacetica (61) PEVRRQYAEIMIEGILKRARDLYAPGIIVELELLPETMKPEWIEINKILRDKMHEYEDK  
RC1 (56) KTLRLREFRANGDALEQCILLGFPGIIIEHNEHVSQMTQNPDWGKEIARQTAGQIDDYD

121

M. barkeri 1 (116) YGKICALRHTIGDIRENREFLQLRG-DKYSVFLEAFEQCAENGADLLSVE SMGGKEVFDY  
M. barkeri 2 (116) YGKICALRHTIGDIRETRDFLALRG-DKYSVFMEAFEQCAQNGADMLAVE SMGGKEVFDY  
M. barkeri 3 (115) YGKICALRHTIGDIRETRDYDLDRG-DKYSTFMEAFEBEANNAGDMLAVE SMGGKEVFDY  
M. acetivorans 1 (115) YGKICALRHTIGDIREDRDYQLRG-DKYSTFMEAFEQCAQNGADLLSVE SMGGKEVFDY  
M. acetivorans 2 (116) YGKICALRHTIGDIRENRDFLQLRG-DKYSVFLEAFEBEAKSGADLLSVE SMGGKEVFDH  
M. acetivorans 3 (116) YGKICALRHTIGDIRESRDYQLRG-DKYNTFIEAFEQCAQNGADLLSVE SMGGKEVFDY  
M. mazei 1 (116) YGKICALRHTIGDIRENRDFLQLRG-DKYSVFLEAFEBEAKAGADLLSVE SMGGKEVFDY  
M. mazei 2 (115) YGKICALRHTIGDIREDRDYQLRG-DKYSVFMEAFEBEAKNGADLLSVE SMGGKEVFDY  
M. mazei 3 (116) YGKICALRHTIGDIRESRDFLELRGGDKYNTFLEAFEBEAKSGADMLSVE SMGGKEIFDY  
M. burtonii 1 (116) YGKICALRHTPGDIRENRDFLDRG-DKFNVMESFEBEIASNGADMLSVE SMGGKEVFDY  
M. burtonii 2 (118) YGKICALRHTPADIRGGKEALDRG-DSYGILLESFEBEIASNGADMLSIE SLGGKSVFDS  
M. stadtmanae 1 (116) FCTKVSMMSTVADMPRE-EENG-LRGSEFDVAMDESFBACAQNGASMLCIE TVGGKVVDY  
M. stadtmanae 2 (116) FCTKVSMMSTVADMPRE-EENG-LRGSEFDVAMDESFBACAQNGASMLCIE TVGGKVVDY  
M. stadtmanae 3 (116) FCAKVSLSMTVADMPRE-EENG-LRGSEFDIAMDESFBACAQNGASMLCIE TVGGKVVDY  
M. stadtmanae 4 (116) YGKTKTSLMSTIADIRE-EDMGGLRGSDFDVMDESFBACAEENGTSILCVETI TVGGKVVDY  
M. thermoacetica (121) YGLKSLLRCPNDITREILRPPLMKRSELLENMFITFBKCAEDGADILSIE STGGKEIVHDE  
RC1 (116) YGLSAGYRATIAIDLRK-PEVAHLRRSDRASLILEAFBACAEH-ADIIISIE SVGGKEISDH

181

M. barkeri 1 (175) AVLRNDIPGLLYSICGLCSIDMELIWDTSKIDAKKTGTISA GDTDCAQANTAMFIAGGLL  
M. barkeri 2 (175) AILRNDMAGVLYGIVLCSIDMEMIQDTSVAKKNNVIAS GDTDCAQANTAMFIAGGLL  
M. barkeri 3 (174) SILRNDTAGILFYGIVLCSIDMEMVWSDTSVAKKTGTVSS GDTDCAQANTAMFIAGGLL  
M. acetivorans 1 (174) SILRNDTAGILFYGIVLCSIDMEMVWSDTADIAKKNGVAA GDTDCAQANTAMFIAGGLL  
M. acetivorans 2 (175) AVLRNDVAGMLYAIGCLCSIDMEMIWDTSIAIAKKTGTVAAGDTDCAQANTAMFIAGGLL  
M. acetivorans 3 (175) AILRNDMAGVLYGIVLCSIDMEMIWDTSADVAKKNNVIAS GDTDCAQANTAMFIAGGLL  
M. mazei 1 (175) AVLRNDIAGMLYAIGCLCSIDMELIWDTSIAIAKKTGTVAAGDTDCAQANTAMFIAGGLL  
M. mazei 2 (174) SILRNDTAGILFYGIVLCSIDMEMVWSDTSIAKKTGTVSA GDTDCAQANTAMFIAGGLL  
M. mazei 3 (176) AILRNDMAGILFYGIVLCSIDMEMIWDTSIAKKTGTISA GDTDCAQANTAMFIAGGLL  
M. burtonii 1 (175) AILRNDVPMGLYAIGCLCTIDMDFIQEITSSVAKKHGTVSAGDTDCSEANTAMFIAGGLL  
M. burtonii 2 (177) SIIRNDLSGVLFYSGILCTLDVFEFIWEDISKIAKKHVDVAA GDTDCSQANTAMFIAGGLL  
M. stadtmanae 1 (174) GISRGDARAILYIGIVLCSIDMEYMWTKIVDIAKRNNVVP GDTDCAQANTAMFLAGGLT  
M. stadtmanae 2 (174) GISRGDARAILYIGIVLCSIDMEYMWTKIVDIAKRNNVVP GDTDCAQANTAMFLAGGLT  
M. stadtmanae 3 (174) GISRGDARAILYIGIVLCSIDMEYMWTKIVDIAKRNNVVP GDTDCAQANTAMFLAGGLT  
M. stadtmanae 4 (175) GISRGDIRAILYIGIVLCSIDMEYMWTKIVDIAKSHDCVPG GDTDCAQANTAMFLAGGLT  
M. thermoacetica (181) ALVTCNIRKAIFALGVLCVDRMRFLVSNIVRIARTGAIAG GDTACGFANTALALA--E  
RC1 (174) AIIRNDVGTGMLFAQAVLGGDRMEWLWPPQIVGIAKKGCIAG GDTDCAQANTAMYLAGGFA

241

\*\*\* \*\*

300

M. barkeri 1 (235) NKNLAHTTAVIARAISAPRSILVAVYEA GAVGFGKDCGYENIIVKATGMPMTMEGKTSTCA  
M. barkeri 2 (235) DKNLAHTLAI IARTISAARSILVAVYEA GAVGFGKDCGYENTIVKSLAGVPIAQEGKTSTCA  
M. barkeri 3 (234) DKNLAHTTAVIARAISAAARSLCAYEAGAI GFGKDCGYENSI IKAISGVPIAQEGKTSTCA  
M. acetivorans 1 (234) DKNLAHTI AVIARAISAGRSILCAYEAGAI GFGKDCGYENTIIKSLAGVPIAQEGKTSTCA  
M. acetivorans 2 (235) DKNLAHTLAI LARAISAPRSILVAVYECGAMGFGKDCGYENI I IKAITGKPMQTQEGKTSTCA  
M. acetivorans 3 (235) DKNLAHTI AI IARAISAARSITLVAVYEA GATGFGKDCGYENSVVKAITAGVPIAQEGKTSTCA  
M. mazei 1 (235) DKNLAHTLAI LARAISAPRSILVAVYECGAMGFGKDCGYENSVVKAITGMPMTQEGKTSTCA  
M. mazei 2 (234) DKNLAHTI AVIARAISAARSILCAYEAGAI GFGKDCGYENSI IKAISGVPIAQEGKTSTCA  
M. mazei 3 (236) DKNLAHTI AI IARTISAARSILVAVYEA GATGFGKDCGYENTIVKAITAGVPIAQEGKTSTCA  
M. burtonii 1 (235) DKNLAHTLAI IARAISAPRSILAAAYEAGAVGFGKDCGYENTIIKAITSGVPIAQEGKSTCA  
M. burtonii 2 (237) DRKLAHTLAVVARAVSAPRSILAAAYEAGAVGFGKDCGYENTIIKAITAGVPIAQEGKSTCA  
M. stadmanae 1 (234) SKNVSHITAAVARA IAGARSLVAVYECGAQGF TKDCGYENIIVKAITASVPICAEGKNATCA  
M. stadmanae 2 (234) SKNVSHITAAVARA IAGARSLVAVYECGAQGF TKDCGYENIIVKAITASVPICAEGKNATCA  
M. stadmanae 3 (234) SKNVSHITAAVARA IAGARSLVAVYECGAQGF TKDCGYENIIVKAITASVPICAEGKNATCA  
M. stadmanae 4 (235) SKNVSHITAAVARA IAGARSLVAVYECGAVGFLKDCGYENIIVKAITGGVPICAEGKNATCA  
M. thermoacetica (238) QGMIPRVFAAVDRVATIPRSILVAVYEMGAI GFDKDCGYE GPYMKAITAGVPI SMEGKTAACA  
RC1 (234) SKDVPHSLAALCRAMAAGRSILVAVYECGATGFGKDCGYENPI IKAITGLPMSAEGKTSACA

301

360

M. barkeri 1 (295) HSDVMGNLVMQCCD LWSNESVVEYHGEFGGTTVQCWSETL AYDCALMNTALETK--NDKVL  
M. barkeri 2 (295) HSDLMGNIVMQCCD LWSNESVVEYHGEFGGTTVQCWGETL AYDCALMNVALNSG--NEKIL  
M. barkeri 3 (294) HSDLMGNIVMQCCD LWSNESVVEYHGEFGGTTVQCWSETL AYDCSMNVVALKGTG--KAKDL  
M. acetivorans 1 (294) HSDLMGNLTMQCCD LWSNESVVEYHGEFGGTTVQCWSETL AYDCAMMNTSLKLG--KAKDL  
M. acetivorans 2 (295) HSDVLGNLIMQCCD LWSNESVVEYHGEFGGTTVQCWSETL AYDCTMNTALETK--NEKVL  
M. acetivorans 3 (295) HSDLMGNLTMQCCD LWSNESVVEYHGEFGGTTVQCWSETL AYDCALMNVALDSG--NEKVL  
M. mazei 1 (295) HSDVMGNLIMQCCD LWSNESVVEYHGEFGGTTVQCWGESL AYDCALMNTALETK--NDKVL  
M. mazei 2 (294) HSDLMGNLVMQCCD LWSNESVVEYHGEFGGTTVQCWSETL AYDCSMNVVALKGTG--KAKDL  
M. mazei 3 (296) HSDLMGNIVMQCCD LWSNESVVEYHGEFGGTTVQCWSETL AYDCSMNVVALQSG--NEKVL  
M. burtonii 1 (295) HSDVMGNLVMQCCD LWSNESVVEYHAEFGGTSVQCWGESL AYDCALMNTATATG--QEKTL  
M. burtonii 2 (297) HSDVMGNLAMQCCD LWSNESVVEYRGEFGGTSVQCWGETL SYDCSMMNTALEAG--YAKVF  
M. stadmanae 1 (294) HSDLMGNLTAAVCD LWSNESVYVNR EEMGGPTPGVWLQSL GYECALMNTATQIG--TNKQL  
M. stadmanae 2 (294) HSDLMGNLTAAVCD LWSNESVYVNR EEMGGPTPGVWLQSL GYECALMNTATQIG--TNKQL  
M. stadmanae 3 (294) HSDLMGNLAAAVCD LWSNESVYVNR EEMGGPTPGVWLQSL GYECALMNTATQIG--TNKQL  
M. stadmanae 4 (295) HSDLMGNLACAVCD LWSNESVYVNR EEMGGPTPGVWLQSL GYECALMNTATKIN--KEKDL  
M. thermoacetica (298) HLSAIGNIAACVCD LWSNESVQNVKLLSAPAPVVSTEQLI YDCRMNEAAADGRSFALKM  
RC1 (294) HLSLGCNVTAAVCD LWSNESVVEYHEMFGGTTPAVFTFEMLYGDAAMMNSSI ALG--FHKEL

361

420

M. barkeri 1 (353) RDLMLSDRYRDPQAYMLAYDNAYRVGQSIVKDGNDIYLRAKNAATECCNIEEGA-AGK  
M. barkeri 2 (353) RDMFVASDIYRDAQGYVLA YQNSYRVGQAIKADGNDIYLRAKNAATECINMSKKEIQ-RAN  
M. barkeri 3 (352) RDILVLSDKYRDPQGYVLA YDNAYRVGAEIAKDGNNYLRAKNAATECCNIEEGVNSGK  
M. acetivorans 1 (352) RDILVLSDKYRDPQGYVLA YDNAYKVGAEIAKDGNNYLRTKAAATECCNIEEIVGINSKG  
M. acetivorans 2 (353) RDLFMLSDRYRDPQGYVLA YDNAYKVGAEIVKDGEDIYLRAKNAAVACCDIVSEGA-AGK  
M. acetivorans 3 (353) RDMFAASDMYRDPQGYVLA YQNA YRVGAEIAKSGNDIYVRAKNAALESIAIVEEGA-KGK  
M. mazei 1 (353) RDLMLSDRYRDPQAYVLA YDNAYRIGQAIKVDGNDIYLRAKNAATEACCDIVSEGA-AGK  
M. mazei 2 (352) RDILVLSDRYRDPQGYVLA YDNAYRVGQAIKADGNNYLRSKNAATECCNIEEIVGINSKG  
M. mazei 3 (354) RDILVASDMYRDAQGYVLA YPHAYRVGAEIVRNGDDIYLRAKNAALETIKIEEGA-KGK  
M. burtonii 1 (353) RDLFMLSDKYRDPQGYVLA YDNAYRVGAEIVKDGNDIYLRAKNAALKSVEIMEEGI-AGK  
M. burtonii 2 (355) RDLFVMSDRYRDPQAFILAFDNAYRIGAEIVKDGNDIYLRAKNAATEACNIVDEGS-RGQ  
M. stadmanae 1 (352) RDTYVLADKYRDPQGVILAYDNAYKIGEAITAEGEDIYLSRRAAATRAMELINEAVDEKR  
M. stadmanae 2 (352) RDTYVLADKYRDPQGVILAYDNAYKIGEAITAEGEDIYLSRRAAATRAMELINEAVDEKR  
M. stadmanae 3 (352) RDTYALADKYRDPQGVILSYDNAYEIGKAITAEGEDIYLSRRAALKALBELINDAVDQNR  
M. stadmanae 4 (353) RDIYTLADKYRDPQALILAYDNAYRIGEAIVAEGEDIYLSRRAALEGISIINEAVDEKR  
M. thermoacetica (358) RDWLAASDRLDPQAYVLRPDIVLEISQELVKEG-DAFIATKKAALAAEVIKRGVLRGE  
RC1 (352) QACMINSDRYRSPHYGILCPDIAWEIGKAI VENNDSMYSRAKAAALKCGQLMSDA---R

421

480

M. barkeri 1 (412) LELSRFETKALADAKAALEALPDDMDKFMDDCLTKYKSEVKVFLPENYGF-----  
M. barkeri 2 (412) SSSYPDRS-----  
M. barkeri 3 (412) LRLTRFETNALAKVKADLEALTDADQFMSDNLT KFKQEVAVFRPENYGL-----  
M. acetivorans 1 (412) LKLTRFETNALAKVKADLEALTDADKFMDSNLT KFKQEVAVFPTENYGL-----  
M. acetivorans 2 (412) LELSRFETKALADAKASLDSLTDMDKFMDDCLTKYKSEVKVFLPENYGF-----  
M. acetivorans 3 (412) LEISR FETKALADAKAAFEGLTDDDKDFMSDCLDKYKKEVVFLEPENYGL-----  
M. mazei 1 (412) LELSRFETKALADAKASLDSLTDMDKFMDDCLTKYKSEVKVFLPENYGF-----  
M. mazei 2 (412) LKLTRFETNALAKVKADLEALTDADKFMDSNLT KFKQEVAVFPTENYGL-----  
M. mazei 3 (413) LELSRFETALANAKTSFEALTDADKFMDSCLTKYKQEVKVFLEPENYGL-----  
M. burtonii 1 (412) LELTRFEGKALADAKAALMALTDQDTFMSDCMTKYKEEVVFLEPENYGL-----  
M. burtonii 2 (414) LELSRFEKASLAKAIKSLHSLTDEKDVFI EENLNKLTSMESFR--SENYGY-----  
M. stadmanae 1 (412) ILLTRFERDITL DSTMKTYEQLPDDKDFIKTCIKRYGRVKVEHDP SQYEL-----  
M. stadmanae 2 (412) ILLTRFERDITL DSTMKTYEQLPDDKDFIKTCIKRYGRVKVEHDP SQYEL-----  
M. stadmanae 3 (412) ILLTRFERDITL DSTLTKYELPDDKDFIKTCIKRYGRVKVEHDP SQYEL-----  
M. stadmanae 4 (413) MFLTRFERDSLDSAQKTIEQLPEDKDFAKACIKRYGRVKVEHDP SQYEL-----  
M. thermoacetica (417) VQVSSREKKWLDI ISSQIETIPDDWEEFWYIEIQBELDLEKFRP--EYDLEVIMARGASAGN  
RC1 (409) LRF TAYERDSLGLGYMKELEALPDREGDFIDMCLKKYERVKAFK--PASVEL-----  
481
